# Supplementary material
Source: PubMed Central journal article supplement (PMC7160048)
Supplement: NIHMS1564768-supplement-Supplementary_Material.pdf [file NIHMS1564768-supplement-Supplementary_Material.pdf]

In the format provided by the authors and unedited.

# Dynamic imaging in patients with tuberculosis reveals heterogeneous drug exposures in pulmonary lesions

Alvaro A. Ordonez<sup>1,2,3</sup>, Hechuan Wang<sup>4</sup>, Gesham Magombedze<sup>5</sup>, Camilo A. Ruiz-Bedoya<sup>1,2,3</sup>, Shashikant Srivastava<sup>5</sup>, Allen Chen<sup>1,6</sup>, Elizabeth W. Tucker<sup>1,2,7</sup>, Michael E. Urbanowski<sup>2,8</sup>, Lisa Pieterse<sup>1,2,7</sup>, E. Fabian Cardozo<sup>9</sup>, Martin A. Lodge<sup>6</sup>, Maunank R. Shah<sup>2,8</sup>, Daniel P. Holt<sup>6</sup>, William B. Mathews<sup>6</sup>, Robert F. Dannals<sup>6</sup>, Jogarao V. S. Gobburu<sup>4</sup>, Charles A. Peloquin<sup>10</sup>, Steven P. Rowe<sup>6</sup>, Tawanda Gumbo<sup>5</sup>, Vijay D. Ivaturi<sup>4</sup> and Sanjay K. Jain<sup>1,2,3,6</sup> ✉

<sup>1</sup>Center for Infection and Inflammation Imaging Research, Johns Hopkins University School of Medicine, Baltimore, MD, USA. <sup>2</sup>Center for Tuberculosis Research, Johns Hopkins University School of Medicine, Baltimore, MD, USA. <sup>3</sup>Department of Pediatrics, Johns Hopkins University School of Medicine, Baltimore, MD, USA. <sup>4</sup>Center for Translational Medicine, University of Maryland School of Pharmacy, Baltimore, MD, USA. <sup>5</sup>Center for Infectious Diseases Research and Experimental Therapeutics, Baylor University Medical Center and Texas Tech University Health Sciences Center, Dallas, TX, USA. <sup>6</sup>Russell H. Morgan Department of Radiology and Radiological Sciences, Johns Hopkins University School of Medicine, Baltimore, MD, USA. <sup>7</sup>Department of Anesthesiology and Critical Care Medicine, Johns Hopkins University School of Medicine, Baltimore, MD, USA. <sup>8</sup>Department of Medicine, Johns Hopkins University School of Medicine, Baltimore, MD, USA. <sup>9</sup>Vaccine and Infectious Disease Division, Fred Hutchinson Cancer Research Center, Seattle, WA, USA. <sup>10</sup>Infectious Disease Pharmacokinetics Laboratory, Pharmacotherapy and Translational Research, University of Florida College of Pharmacy, Gainesville, FL, USA. ✉e-mail: [sjain5@jhmi.edu](mailto:sjain5@jhmi.edu)

## Supplementary information

### Dynamic Imaging in Tuberculosis Patients Reveals Heterogeneous Drug Exposures in Pulmonary Lesions

Alvaro A. Ordonez<sup>1,2,3</sup>, Hechuan Wang<sup>4</sup>, Gesham Magombedze<sup>5</sup>, Camilo A. Ruiz-Bedoya<sup>1,2,3</sup>, Shashikant Srivastava<sup>5</sup>, Allen Chen<sup>1,6</sup>, Elizabeth W. Tucker<sup>1,2,7</sup>, Michael E. Urbanowski<sup>2,8</sup>, Lisa Pieterse<sup>1,2,7</sup>, E. Fabian Cardozo<sup>9</sup>, Martin A. Lodge<sup>6</sup>, Maunank R. Shah<sup>2,8</sup>, Daniel P. Holt<sup>6</sup>, William B. Mathews<sup>6</sup>, Robert F. Dannals<sup>6</sup>, Jogarao V. S. Gobburu<sup>4</sup>, Charles A. Peloquin<sup>10</sup>, Steven P. Rowe<sup>6</sup>, Tawanda Gumbo<sup>5</sup>, Vijay D. Ivaturi<sup>4</sup>, Sanjay K. Jain<sup>1,2,3,6\*</sup>

<sup>1</sup>Center for Infection and Inflammation Imaging Research, Johns Hopkins University School of Medicine, Baltimore, MD, USA

<sup>2</sup>Center for Tuberculosis Research, Johns Hopkins University School of Medicine, Baltimore, MD, USA

<sup>3</sup>Department of Pediatrics, Johns Hopkins University School of Medicine, Baltimore, MD, USA

<sup>4</sup>Center for Translational Medicine, University of Maryland School of Pharmacy, Baltimore, MD, USA

<sup>5</sup>Center for Infectious Diseases Research and Experimental Therapeutics, Baylor University Medical Center and Texas Tech University Health Sciences Center, Dallas, TX, USA

<sup>6</sup>Russell H. Morgan Department of Radiology and Radiological Sciences, Johns Hopkins University School of Medicine, Baltimore, MD, USA

<sup>7</sup>Department of Anesthesiology and Critical Care Medicine, Johns Hopkins University School of Medicine, Baltimore, MD, USA

<sup>8</sup>Department of Medicine, Johns Hopkins University School of Medicine, Baltimore, MD, USA

<sup>9</sup>Vaccine and Infectious Disease Division, Fred Hutchinson Cancer Research Center, Seattle, WA, USA

<sup>10</sup>Infectious Disease Pharmacokinetics Laboratory, Pharmacotherapy and Translational Research, University of Florida College of Pharmacy, Gainesville, FL, USA

\*Corresponding author

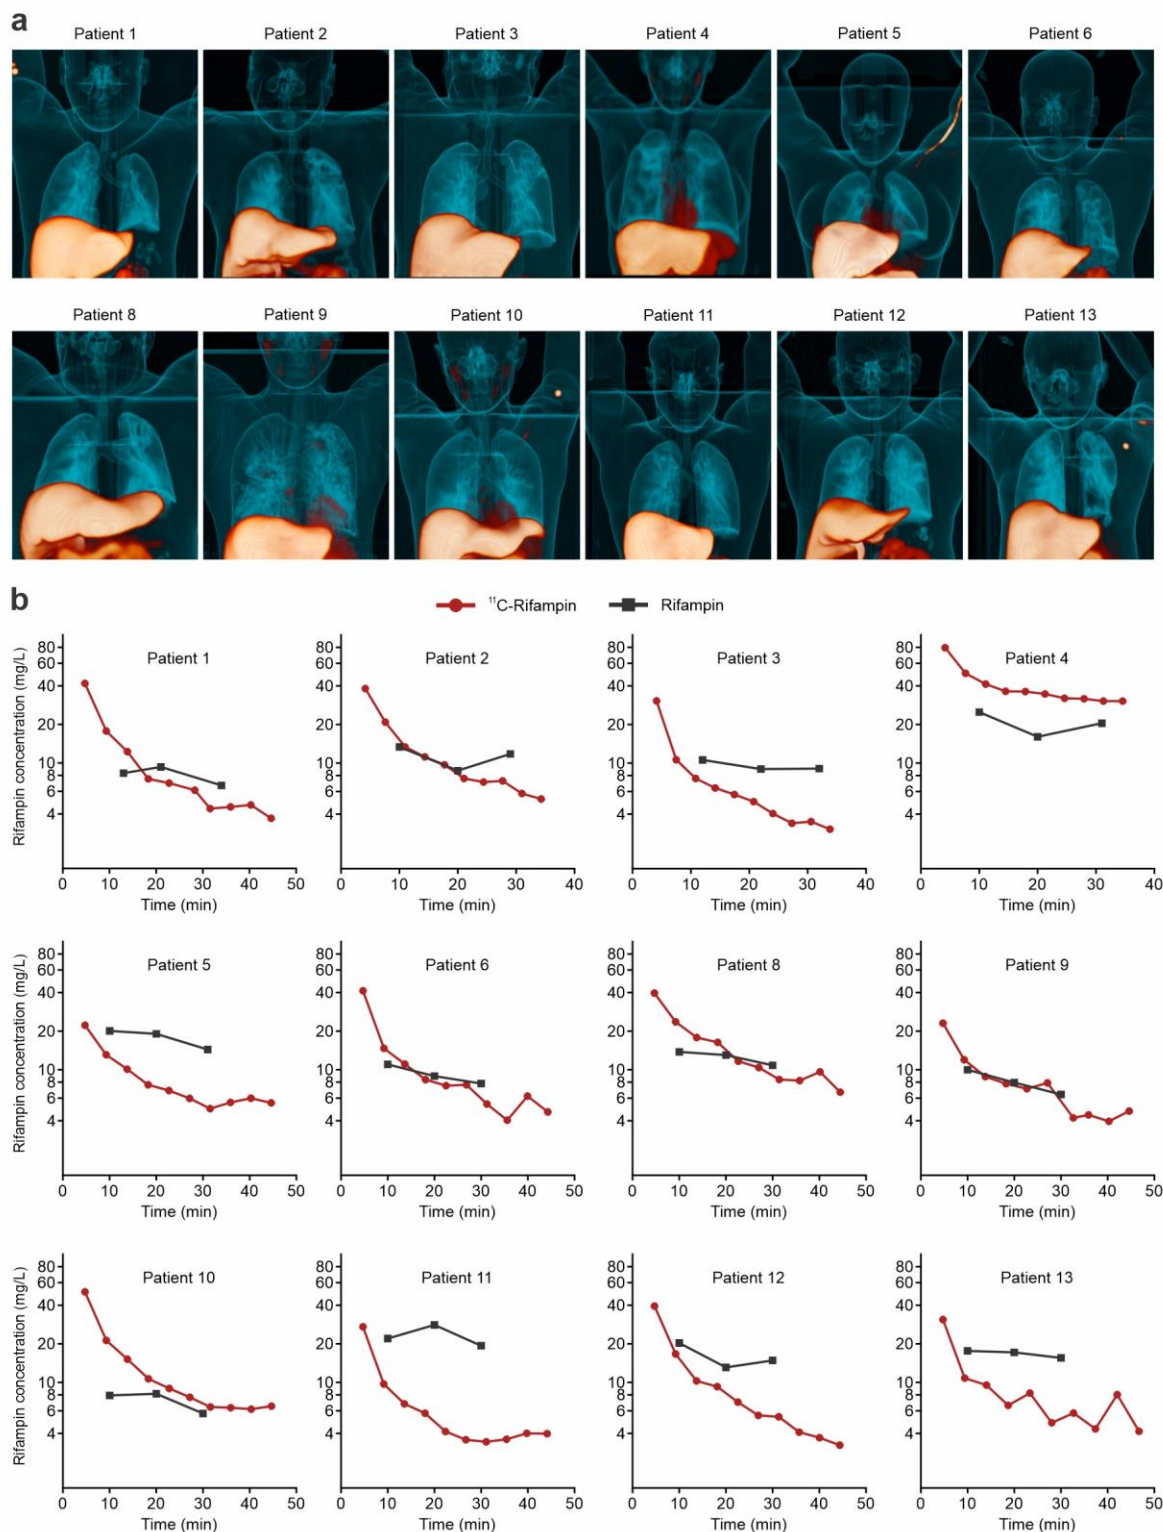

**Supplementary Figure 1.  $^{11}\text{C}$ -Rifampin PET/CT in TB patients. (a)** Three-dimensional maximum intensity projection (MIP) of all participants. The CT is represented in blue while the  $^{11}\text{C}$ -rifampin PET signal is represented in orange. **(b)** Excellent matching between dose-normalized plasma  $^{11}\text{C}$ -rifampin PET signal and plasma rifampin levels measured using mass spectrometry, obtained on the same day, is shown. The dose normalization of the  $^{11}\text{C}$ -rifampin concentrations was made under the assumption of pharmacokinetic linearity across the range of doses from microdose to therapeutic rifampin dosing. Patient 7 was excluded from the study due to significant motion artifact during the  $^{11}\text{C}$ -rifampin PET/CT.

**Supplementary Table 1. Selection criteria for patient enrollment in the clinical study.**

- Greater than or equal to 18 years of age
- Confirmation of *Mycobacterium tuberculosis* by culture or molecular testing (GeneXpert) and susceptible to rifampin
- Imaging evidence demonstrating pulmonary disease and currently being administered a rifampin-based TB drug regimen
- On TB treatment for  $\leq 6$  weeks by the time of the  $^{11}\text{C}$ -rifampin PET/CT. Repeat imaging was also performed in subjects on TB treatment  $>13$  weeks (90 days)
- Not pregnant
- Platelet count  $> 50,000/\text{mm}^3$
- Neutrophil count  $> 1,000/\text{mm}^3$
- Serum creatinine  $< 3$  times the upper limit of normal
- Total bilirubin  $< 3$  times the upper limit of normal
- Liver transaminases  $< 5$  times the upper limit of normal
- Not treated with an investigational drug, biologic, or therapeutic device within 30 days prior to the  $^{11}\text{C}$ -rifampin PET/CT
- Adequate venous access
- Ability to provide written informed consent

**Supplementary Table 2. Mass spectrometry results of plasma samples from patients.**

| Patient ID | Minutes after an IV dose of 600mg of rifampin | Drug concentration (µg/mL) |                       |
|------------|-----------------------------------------------|----------------------------|-----------------------|
|            |                                               | Rifampin                   | 25-Desacetyl Rifampin |
| 1          | Pre-dose                                      | Not detected               | Not detected          |
|            | 13                                            | 8.32                       | 0.19                  |
|            | 21                                            | 9.31                       | 0.35                  |
|            | 34                                            | 6.68                       | 0.33                  |
| 2          | Pre-dose                                      | 0.02                       | Not detected          |
|            | 10                                            | 13.37                      | 0.43                  |
|            | 20                                            | 8.72                       | 0.30                  |
|            | 29                                            | 11.79                      | 0.58                  |
| 3          | Pre-dose                                      | Not detected               | Not detected          |
|            | 12                                            | 10.58                      | 0.66                  |
|            | 22                                            | 8.97                       | 0.71                  |
|            | 32                                            | 9.05                       | 0.78                  |
| 4          | Pre-dose                                      | 1.39                       | 0.84                  |
|            | 10                                            | 24.98                      | 2.71                  |
|            | 20                                            | 16.06                      | 2.18                  |
|            | 31                                            | 20.47                      | 3.19                  |
| 5          | Pre-dose                                      | 0.12                       | 0.01                  |
|            | 10                                            | 20.08                      | 0.93                  |
|            | 20                                            | 19.06                      | 1.14                  |
|            | 31                                            | 14.36                      | 0.87                  |
| 6          | Pre-dose                                      | 0.01                       | Not detected          |
|            | 10                                            | 10.99                      | 0.31                  |
|            | 20                                            | 8.92                       | 0.31                  |
|            | 30                                            | 7.79                       | 0.33                  |
| 8          | Pre-dose                                      | Not detected               | Not detected          |
|            | 10                                            | 13.78                      | 0.21                  |
|            | 20                                            | 13.00                      | 0.22                  |
|            | 30                                            | 10.83                      | 0.28                  |
| 9          | Pre-dose                                      | 0.04                       | 0.00                  |
|            | 10                                            | 9.98                       | 0.31                  |
|            | 20                                            | 7.94                       | 0.36                  |
|            | 30                                            | 6.42                       | 0.35                  |
| 10         | Pre-dose                                      | 0.02                       | Not detected          |
|            | 10                                            | 7.91                       | 0.31                  |
|            | 20                                            | 8.15                       | 0.38                  |
|            | 30                                            | 5.73                       | 0.31                  |
| 11         | Pre-dose                                      | Not detected               | Not detected          |
|            | 10                                            | 21.98                      | 0.86                  |
|            | 20                                            | 28.08                      | 1.32                  |
|            | 30                                            | 19.32                      | 1.07                  |
| 12         | Pre-dose                                      | 0.04                       | Not detected          |
|            | 10                                            | 20.29                      | 0.57                  |
|            | 20                                            | 13.10                      | 0.46                  |
|            | 30                                            | 14.83                      | 0.51                  |
| 13         | Pre-dose                                      | Not detected               | Not detected          |
|            | 10                                            | 17.62                      | 0.80                  |
|            | 20                                            | 17.15                      | 0.84                  |
|            | 30                                            | 15.54                      | 0.86                  |

**Supplementary Table 3. Rifampin PK-lung-biodistribution model parameter estimates and 95% confidence interval. n=12 patients.**

|                                                                                            | Unit      | Estimate    | Between subject variability, BSV (%CV) | 95% Confidence interval |      |
|--------------------------------------------------------------------------------------------|-----------|-------------|----------------------------------------|-------------------------|------|
| Maximal elimination rate ( $V_{\max}$ )                                                    | L/hr/70kg | 525 FIX     |                                        |                         |      |
| Rifampicin concentration at which the elimination is half-maximal ( $K_m$ )                | mg/L      | 70 FIX      |                                        |                         |      |
| Volume of distribution ( $V_c$ )                                                           | L/70kg    | 37          | 40                                     | 29                      | 51   |
| Equilibration rate constant between venous and left ventricle compartments ( $K_{eq-lv}$ ) | /hr       | 40          |                                        | 38.2                    | 41.8 |
| Partition Coefficient for left ventricle compartment ( $PC_{LV}$ )                         |           | 0.38        |                                        | -1.47                   | 2.23 |
| Equilibration rate constant between venous and lung compartments ( $K_{eq-lung}$ )         | /hr       | 42 FIX      |                                        |                         |      |
| Partition Coefficient for unaffected lung ( $PC_{UL}$ )                                    |           | 1.2         | 22                                     | 0.88                    | 1.5  |
| Partition Coefficient for pulmonary lesion ( $PC_{PL}$ )                                   |           | 0.69        | 23                                     | 0.53                    | 0.85 |
| Partition Coefficient for cavity wall ( $PC_{CW}$ )                                        |           | 0.60        | 17                                     | 0.43                    | 0.77 |
| Clearance for microdose ( $CL_{mic}$ )                                                     | L/hr/70kg | 22          | 21                                     | 20.1                    | 23.8 |
| Volume of distribution for microdosing ( $V_{c,mic}$ )                                     | L/70kg    | 10          | 48                                     | 8.2                     | 11.8 |
| Maximal increase in the enzyme production rate ( $S_{\max}$ )                              |           | 1.04 FIX    |                                        |                         |      |
| Rifampin concentration at which half the $S_{\max}$ is reached ( $SC_{50}$ )               | mg/L      | 0.0705 FIX  |                                        |                         |      |
| Rate constant for first-order degradation of the enzyme pool ( $k_{enz}$ )                 | /hr       | 0.00369 FIX |                                        |                         |      |
| Mean transit time (MTT)                                                                    | hr        | 0.713 FIX   |                                        |                         |      |

**Supplementary Table 4. Simulated rifampin AUC<sub>0-24</sub> at steady state (ss).** Values represent simulation after oral and intravenous (IV) administration of daily doses of rifampin from 10-50 mg/kg in plasma and lung regions based on the PK-lung-biodistribution model. Oral bioavailability was assumed to be 90%. Median, [10<sup>th</sup>, 90<sup>th</sup>] percentiles are reported. n=1000 virtual patients generated by Monte Carlo Simulations using the developed lung-biodistribution model.

|      | Daily dose (mg/kg) | Plasma AUC <sub>24hr,ss</sub> (mg·hr/L) | Unaffected lung AUC <sub>24hr,ss</sub> (mg·hr/kg) | Lesion AUC <sub>24hr,ss</sub> (mg·hr/kg) | Cavity wall AUC <sub>24hr,ss</sub> (mg·hr/kg) |
|------|--------------------|-----------------------------------------|---------------------------------------------------|------------------------------------------|-----------------------------------------------|
| Oral | 10                 | 50.5<br>[46.2, 62.8]                    | 16.05<br>[8.49, 29.9]                             | 8.8<br>[4.69, 17.32]                     | 7.9<br>[4.4, 13.41]                           |
|      | 15                 | 77.5<br>[70.1, 99.4]                    | 23.35<br>[12.6, 44.41]                            | 13.5<br>[7.4, 24.83]                     | 12.45<br>[7.1, 21.62]                         |
|      | 20                 | 104.85<br>[94.7, 140.06]                | 33.45<br>[17.98, 59.61]                           | 18.7<br>[10.59, 36.81]                   | 16.8<br>[9.6, 30.3]                           |
|      | 25                 | 134.35<br>[120.4, 179.83]               | 41.5<br>[22.8, 79.62]                             | 23.85<br>[12.6, 47.51]                   | 21.3<br>[12, 38.43]                           |
|      | 30                 | 166.65<br>[147, 235.62]                 | 51.55<br>[27.8, 95.11]                            | 31.1<br>[16.6, 58.92]                    | 26.5<br>[14.9, 49.11]                         |
|      | 35                 | 199.9<br>[174.59, 276.3]                | 62.4<br>[33.27, 117.91]                           | 37.1<br>[19.1, 70.8]                     | 32.4<br>[18.2, 56.6]                          |
|      | 40                 | 234.7<br>[203.19, 337.96]               | 73.5<br>[37.1, 152.02]                            | 41.35<br>[21.3, 85.5]                    | 37.3<br>[20.59, 69]                           |
|      | 45                 | 268.6<br>[232.89, 401.98]               | 87.35<br>[44.89, 168.76]                          | 49.45<br>[24.3, 97.52]                   | 42.05<br>[23.2, 78.91]                        |
|      | 50                 | 306.7<br>[263.49, 437.42]               | 99.25<br>[50.59, 187.13]                          | 55.3<br>[29.1, 111.77]                   | 48.05<br>[27.27, 91.4]                        |
| IV   | 10                 | 57<br>[51.5, 73.5]                      | 17.75<br>[9.2, 34.14]                             | 10.2<br>[5.5, 19.1]                      | 9<br>[5.2, 15.9]                              |
|      | 15                 | 86.9<br>[78.5, 117.91]                  | 28<br>[14.89, 52.03]                              | 16.1<br>[8.1, 29.4]                      | 13.4<br>[7.8, 24.51]                          |
|      | 20                 | 121<br>[106.8, 172.81]                  | 38.1<br>[19.89, 75.94]                            | 21.6<br>[12.4, 43.36]                    | 18.7<br>[10.8, 36.63]                         |
|      | 25                 | 156.05<br>[135.7, 221.22]               | 49<br>[26.18, 97.79]                              | 28.2<br>[15, 56.32]                      | 24.8<br>[13.8, 43.21]                         |
|      | 30                 | 191.9<br>[166.28, 275.37]               | 59.9<br>[30.95, 119.61]                           | 34.3<br>[18.3, 69.72]                    | 30.1<br>[16.79, 54.01]                        |
|      | 35                 | 230.65<br>[198.79, 346.92]              | 75.6<br>[39.16, 145.26]                           | 42.4<br>[21.6, 91.18]                    | 36.25<br>[21, 68.5]                           |
|      | 40                 | 273.8<br>[232, 416.6]                   | 86.2<br>[45.77, 169.04]                           | 50.05<br>[24.99, 108.01]                 | 43.65<br>[24.39, 82.01]                       |
|      | 45                 | 316.95<br>[268.09, 496.35]              | 100.9<br>[53.1, 204.56]                           | 57.65<br>[29.49, 115.21]                 | 50.35<br>[28.58, 95.3]                        |
|      | 50                 | 364.2<br>[302.5, 576.06]                | 115.3<br>[59.78, 237.92]                          | 68.4<br>[33.2, 136.42]                   | 58.65<br>[32.84, 118.4]                       |

**Supplementary Table 5. Injected dose and tissue AUC ratios derived from <sup>11</sup>C-rifampin PET.** Rifampin area under the concentration-time curves (AUC) were obtained by integrating the area under the dynamic <sup>11</sup>C-rifampin PET time-activity curves and the tissue AUC ratio (tissue to plasma) calculated for all patients.

| Participant number | Injected mass (ng) | AUC (ng·h/g) |               |         |                 | AUC ratio to plasma |         |                 |
|--------------------|--------------------|--------------|---------------|---------|-----------------|---------------------|---------|-----------------|
|                    |                    | Plasma       | Cavitary wall | Lesions | Unaffected lung | Cavitary wall       | Lesions | Unaffected lung |
| 1                  | 1322.10            | 75.33        | -             | 26.37   | 54.94           | -                   | 0.35    | 0.73            |
| 2                  | 3051.48            | 138.56       | -             | 68.07   | 149.66          | -                   | 0.49    | 1.08            |
| 3                  | 940.42             | 27.08        | 6.64          | 7.47    | 25.12           | 0.25                | 0.28    | 0.93            |
| 4                  | 749.66             | 103.84       | 30.56         | 30.70   | 82.84           | 0.29                | 0.30    | 0.80            |
| 5                  | 1134.77            | 51.00        | -             | -       | 39.51           | -                   | -       | 0.77            |
| 6                  | 1030.64            | 56.73        | 17.50         | 22.48   | 40.61           | 0.31                | 0.40    | 0.72            |
| 8                  | 537.51             | 39.75        | -             | 10.52   | 20.38           | -                   | 0.26    | 0.51            |
| 9                  | 608.41             | 25.61        | 9.06          | 16.44   | 19.90           | 0.35                | 0.64    | 0.78            |
| 10                 | 725.35             | 51.15        | -             | 19.54   | 46.33           | -                   | 0.38    | 0.91            |
| 11                 | 1551.15            | 54.17        | 13.26         | 16.72   | 25.20           | 0.24                | 0.31    | 0.47            |
| 12                 | 2043.49            | 108.96       | 49.16         | 48.08   | 77.56           | 0.45                | 0.44    | 0.71            |
| 13                 | 1335.98            | 73.17        | -             | 33.68   | 44.34           | -                   | 0.46    | 0.61            |

**Supplementary Table 6. Digitized data used for external validation.** The PK model was externally validated using digitized data from 14 studies with TB patients.

| Publication                                                               | Year | Population |
|---------------------------------------------------------------------------|------|------------|
| <a href="#"><u>Loos et al. <i>Klin Wochenschr</i></u></a>                 | 1985 | Adults     |
| <a href="#"><u>Koup et al. <i>Ther Drug Monit</i></u></a>                 | 1986 | Children   |
| <a href="#"><u>Ruslami et al. <i>Antimicrob Agents Chemother</i></u></a>  | 2007 | Adults     |
| <a href="#"><u>Schaaf et al. <i>BMC Med</i></u></a>                       | 2009 | Children   |
| <a href="#"><u>Thee et al. <i>Antimicrob Agents Chemother</i></u></a>     | 2011 | Children   |
| <a href="#"><u>Ruslami et al. <i>Lancet Infect Dis</i></u></a>            | 2013 | Adults     |
| <a href="#"><u>Ramachandran et al. <i>Int J Tuberc Lung Dis</i></u></a>   | 2013 | Children   |
| <a href="#"><u>Hiruy et al. <i>J Antimicrob Chemother</i></u></a>         | 2015 | Children   |
| <a href="#"><u>Boeree et al. <i>Am J Respir Crit Care Med</i></u></a>     | 2015 | Adults     |
| <a href="#"><u>Chigutsa et al. <i>Antimicrob Agents Chemother</i></u></a> | 2015 | Adults     |
| <a href="#"><u>Kwara et al. <i>J Pediatric Infect Dis Soc</i></u></a>     | 2016 | Children   |
| <a href="#"><u>Swaminathan et al. <i>Clin Infect Dis</i></u></a>          | 2016 | Children   |
| <a href="#"><u>Bekker et al. <i>Antimicrob Agents Chemother</i></u></a>   | 2016 | Children   |
| <a href="#"><u>Boeree et al. <i>Lancet Infect Dis</i></u></a>             | 2017 | Adults     |
